# Supplementary material for: Electrochemical synthesis of MnO2porous nanowires for flexible all-solid-state supercapacitor
Source: Royal Society of Chemistry journal article supplement (doi:10.1039/c6nj04118c), 2017-01-01
Supplement: c6nj04118c1.pdf [file c6nj04118c1.pdf]

## Electrochemical synthesis of MnO<sub>2</sub> porous nanowires for flexible all-solid-state supercapacitor

Juan Song<sup>a</sup>, Huihua Li<sup>a</sup>, Sizhe Li<sup>a</sup>, Hongli Zhu<sup>a</sup>, You Ge<sup>a</sup>, Shu Wang<sup>a</sup>, Xiaomiao Feng\*<sup>a</sup>, and Yuge Liu\*<sup>b</sup>

<sup>a</sup> Key Laboratory for Organic Electronics and Information Displays & Institute of Advanced Materials, National Jiangsu Synergistic Innovation Center for Advanced Materials (SICAM), 9 Wenyuan Road, Nanjing 210023, China.

<sup>b</sup> The South Subtropical Crop Research Institute, Chinese Academy of Tropical Agricultural Science, Zhanjiang, 524091, China.

\*Corresponding authors

E-mail: iamxmfeng@njupt.edu.cn

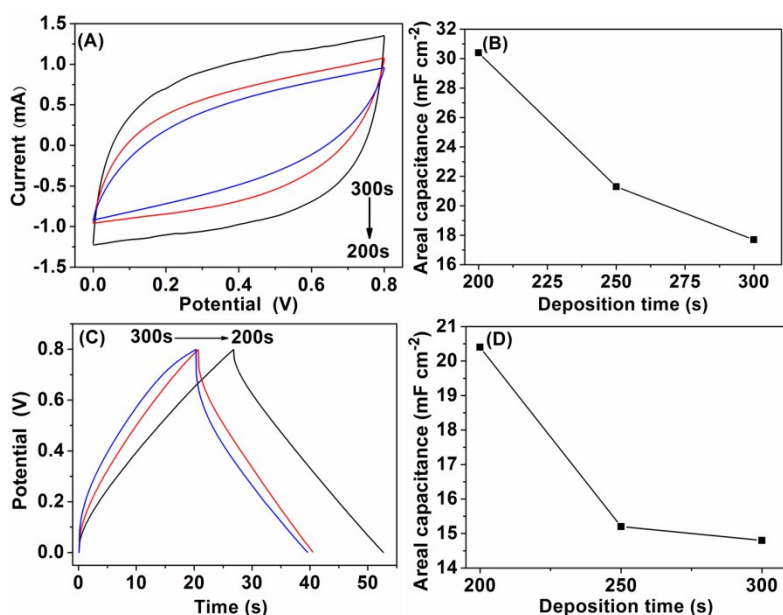

Fig.1. (A) Cyclic voltammetry curves of the PC-Au-MnO<sub>2</sub> at a scan rate of 100 mV s<sup>-1</sup> with different MnO<sub>2</sub> deposition time of 200, 250, and 300s, respectively. (B) Surface capacitances with respect to different deposition time of MnO<sub>2</sub> at a scan rate of 100 mV s<sup>-1</sup>. (C) Galvanostatic charge-discharge curves of the PC-Au-MnO<sub>2</sub> at a current density of 0.6 mA cm<sup>-2</sup> with different MnO<sub>2</sub> deposition time of 200, 250, and 300s, respectively. (D) Surface capacitances with respect to different deposition time of MnO<sub>2</sub> at a current density of 0.6 mA cm<sup>-2</sup>.
